# Supplementary material for: Development of an anti-human EphA2 monoclonal antibody Ea2Mab-7 for multiple applications
Source: Biochem Biophys Rep. 2025 Apr 1;42:101998. doi: 10.1016/j.bbrep.2025.101998 (PMC11999297; doi:10.1016/j.bbrep.2025.101998)
Supplement: Multimedia component 1 [file mmc1.docx]

Supplementary Table 1 Anti-EphA2 monoclonal antibodies

| Clone | Host | Subclass | FCM | *K*D(M)* | WB | IHC |
| --- | --- | --- | --- | --- | --- | --- |
| Ea2Mab-7 | Mouse | IgG1, κ | + | 7.7×10-9 [CHO/EphA2] | + | + |
| 2.1×10-9  [MDA-MB-231] |
| SHM16 | Mouse | IgG2b, κ | + | 8.4×10-9 [CHO/EphA2] | - | n. d. |
| 2.3×10-9  [MDA-MB-231] |
| D4A2 | Rabbit | IgG | n. d. | n. d. | + | + |
| 1C11A12 | Mouse | IgG1, κ | n. d. | n. d. | + | + |
| MAB3035 | Mouse | IgG2a | + | n. d. | + | + |

n. d.: not determined

*The *K*D values of Ea2Mab-7 and SHM16 were determined in this study.
